# Supplementary material for: Prediction of Neonatal Respiratory Morbidity Assessed by Quantitative Ultrasound Lung Texture Analysis in Twin Pregnancies
Source: MDPI journal article supplement (doi:10.3390/jcm11164895), 2022-08-20
Supplement: s1 [file s1]

**Supplementary Table S1**

Summary of excluded cases due to administration of antenatal steroids after image acquisition and before delivery.

| Case | LMP      | Date Scan | GA Scan | Date Steroids | Date delivery | GA delivery | QFLM risk | RDS | TTN | Type result    |
|------|----------|-----------|---------|---------------|---------------|-------------|-----------|-----|-----|----------------|
| 1    | 31/5/17  | 19/1/18   | 33.4    | 19-20/1/18    | 21/1/18       | 33.6        | Low       | No  | Yes | False negative |
| 1    | 31/5/17  | 19/1/18   | 33.4    | 19-20/1/18    | 21/1/18       | 33.6        | Low       | No  | No  | True negative  |
| 2    | 1/7/18   | 1/3/19    | 34.5    | 1-2/3/19      | 3/3/19        | 35.0        | Low       | No  | No  | True negative  |
| 3    | 12/5/18  | 9/1/19    | 34.4    | 9-10/1/19     | 10/1/19       | 34.5        | Low       | No  | No  | True negative  |
| 3    | 12/5/18  | 9/1/19    | 34.4    | 9-10/1/19     | 10/1/19       | 34.5        | Low       | Yes | No  | False negative |
| 4    | 25/9/17  | 22/5/18   | 33.5    | 22-23/5/18    | 24/5/18       | 34.0        | Low       | No  | Yes | False negative |
| 4    | 25/9/17  | 22/5/18   | 33.5    | 22-23/5/18    | 24/5/18       | 34.0        | Low       | No  | No  | True negative  |
| 5    | 16/12/18 | 26/7/19   | 31.5    | 26-27/7/19    | 29/7/19       | 32.1        | High      | No  | Yes | True positive  |
| 5    | 16/12/18 | 26/7/19   | 31.5    | 26-27/7/19    | 29/7/19       | 32.1        | High      | No  | Yes | True positive  |
| 6    | 12/6/18  | 30/10/18  | 32.3    | 16-17/10/18   | 3/11/18       | 33.0        | Low       | No  | No  | True negative  |
| 6    | 12/6/18  | 30/10/18  | 32.3    | 16-17/10/18   | 3/11/18       | 33.0        | Low       | No  | No  | True negative  |
| 7    | 8/1/19   | 3/9/19    | 34.0    | 5/9/19        | 5/9/19        | 34.2        | Low       | No  | No  | True negative  |
| 7    | 8/1/19   | 3/9/19    | 34.0    | 5/9/19        | 5/9/19        | 34.2        | Low       | No  | No  | True negative  |

LMP: last menstrual period. GA: gestational age. QFLM: quantus fetal lung maturity test. RDS: respiratory distress syndrome. TTN: transient tachypnea of the newborn

Supplementary Table S2

**Summary of performance of quantusFLM® in general population and in twin pregnancies to predict neonatal respiratory morbidity**

|          | Accuracy | Sensitivity | Specificity | PPV  | NPV  | F1-Score |
|----------|----------|-------------|-------------|------|------|----------|
| *General | 91.5     | 71.0        | 94.7        | 67.9 | 95.4 | 69.4     |
| Twin     | 89.2     | 42.9        | 95.9        | 60.0 | 92.1 | 50.0     |

\*Burgos-Artizzu XP, et al. *Evaluation of an improved tool for non-invasive prediction of neonatal respiratory morbidity based on fully automated fetal lung ultrasound analysis. Sci Rep* 2019.

Supplementary Table S3

**Pre-test risks and probabilities, positives and negatives likelihood ratios and a post-test probabilities and risks of the neonatal respiratory morbidity in twin pregnancies**

| Edad    | A priori risk | A priori probability | LR +  | A posteriori probability (LR+) | LR - | A posteriori probability (LR-) | A posteriori risk (LR+) | a posteriori risk (LR-) |
|---------|---------------|----------------------|-------|--------------------------------|------|--------------------------------|-------------------------|-------------------------|
| <30     | 87,50%        | 7,00                 | 22,30 | 156,10                         | 0,48 | 3,36                           | 99,4%                   | 77,06%                  |
| 30-31   | 73,50%        | 2,77                 | 22,30 | 61,85                          | 0,48 | 1,33                           | 98,4%                   | 57,11%                  |
| 32-33   | 41,20%        | 0,70                 | 22,30 | 15,63                          | 0,48 | 0,34                           | 94,0%                   | 25,17%                  |
| 34-34.6 | 19,80%        | 0,25                 | 1,20  | 0,30                           | 0,90 | 0,22                           | 22,9%                   | 18,18%                  |
| 35-35.6 | 8,90%         | 0,10                 | 1,20  | 0,12                           | 0,90 | 0,09                           | 10,5%                   | 8,08%                   |
| 36-36.6 | 4,50%         | 0,05                 | 1,20  | 0,06                           | 0,90 | 0,04                           | 5,4%                    | 4,07%                   |

+/- LR: positive/negative likelihood ratios.
